# Supplementary material for: Near-IR absorbing 1,1,4,4-tetracyanobutadiene-functionalized phenothiazine sulfones
Source: Royal Society of Chemistry journal article supplement (doi:10.1039/d3ob00361b), 2023-01-01
Supplement: d3ob00361b1.pdf [file d3ob00361b1.pdf]

## Near-IR absorbing 1,1,4,4-tetracyanobutadiene-functionalized Phenothiazine Sulfones

Manju Sheokand, Nikhil Ji Tiwari and Rajneesh Misra<sup>\*,a</sup>

<sup>a</sup>Department of Chemistry, Indian Institute of Technology Indore,  
Indore- 453552, India

\* Corresponding author  
Email: rajneeshmisra@iiti.ac.in

### Table of Contents

|                                                            |                |
|------------------------------------------------------------|----------------|
| <b>I. Synthetic scheme of TPA1.....</b>                    | <b>S2</b>      |
| <b>II. Solvatochromism.....</b>                            | <b>S2</b>      |
| <b>III. Aggregation Induced Emission.....</b>              | <b>S3</b>      |
| <b>IV. Cyclic voltammograms of TPA1–TPA5.....</b>          | <b>S4</b>      |
| <b>V. Copies of NMR and HRMS Spectra of TPA1–TPA5.....</b> | <b>S5–S19</b>  |
| <b>VI. Elemental Analysis of TPA1–TPA5.....</b>            | <b>S19–S21</b> |
| <b>VII. TD-DFT Data of TPA1–TPA5.....</b>                  | <b>S22-S54</b> |

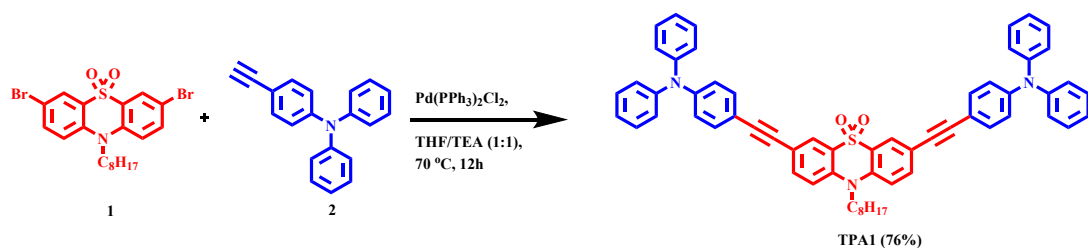

**Scheme S1.** Synthetic route of symmetrical phenothiazine sulfone based chromophores **TPA1**.

### Solvatochromism.

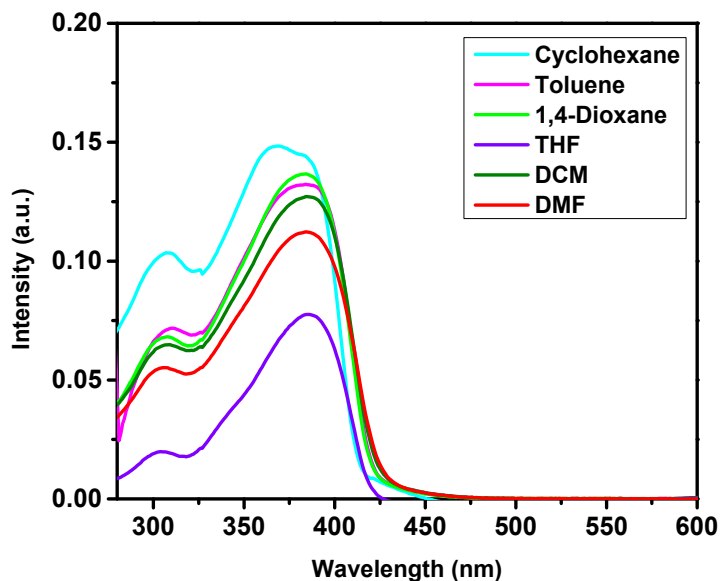

**Fig. S1** Electronic absorption spectra of **TPA1** (excitation wavelength or  $\lambda_{\text{ex}}=370$  nm) in solvents of different polarities.

## Aggregation Induced Emission.

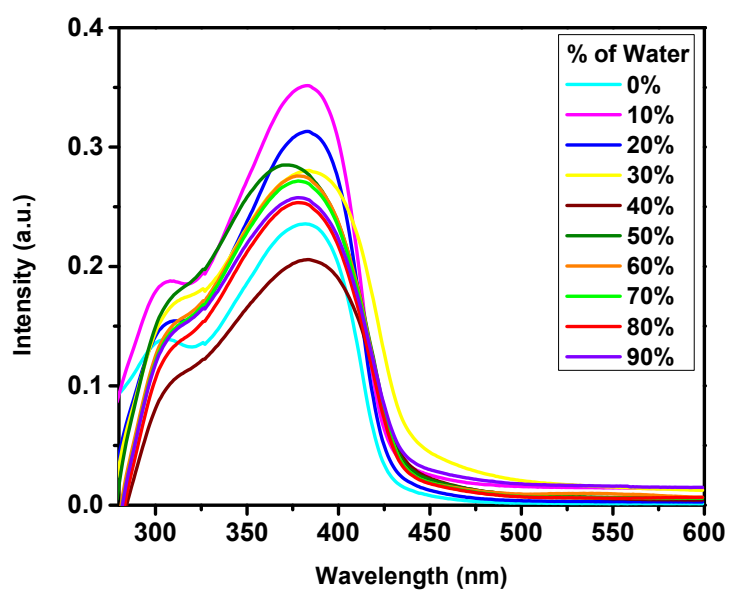

**Fig. S2** Electronic absorption spectra of **TPA1** in DMF-water mixtures (0% to 90% water), Luminogen concentration: 10  $\mu\text{M}$ ; intensity calculated at  $\lambda_{\text{max}}$ .

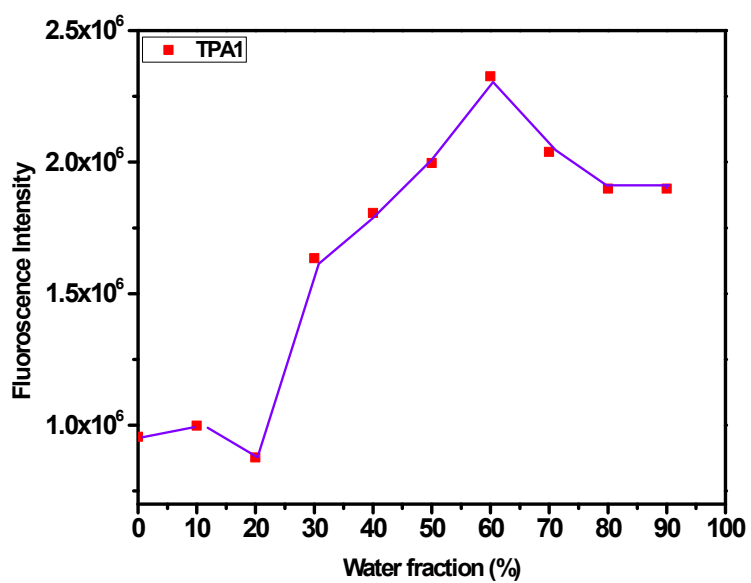

**Fig. S3** Plot of fluorescence intensity vs. % of water fraction ( $f_w$ ) for **TPA1**. Luminogen concentration: 10  $\mu\text{M}$ ; intensity calculated at  $\lambda_{\text{max}}$ .

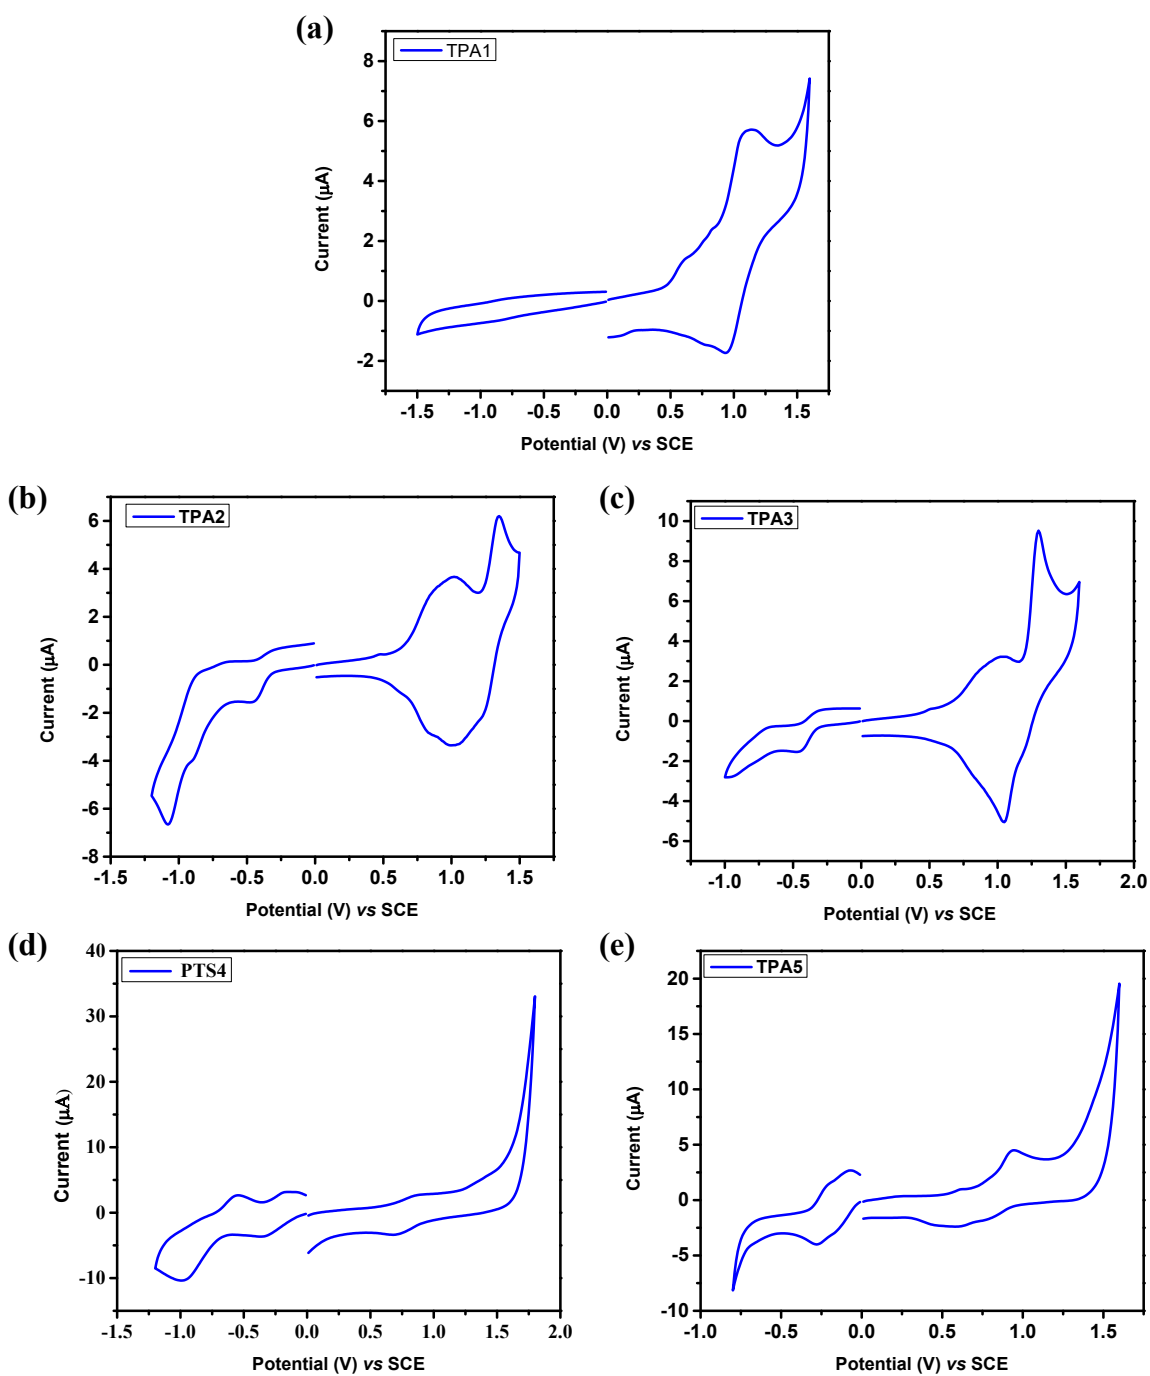

**Fig. S4** Differential pulse voltammetry of TPA1–TPA5 recorded in  $\text{CH}_2\text{Cl}_2$  (0.1 M  $\text{Bu}_4\text{NPF}_6$ ) at a glassy carbon working electrode and a voltage scan rate of  $0.1 \text{ V s}^{-1}$ .

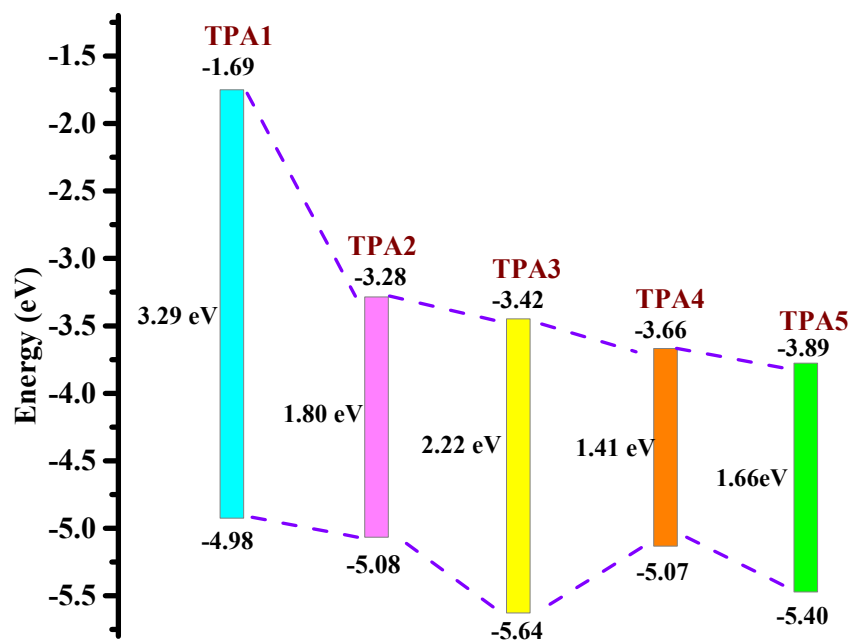

**Fig. S5** Energy level diagram of the frontier orbitals of **TPA1–TPA5** estimated by DFT calculations.

# Copies of NMR and Mass spectra of the new compounds

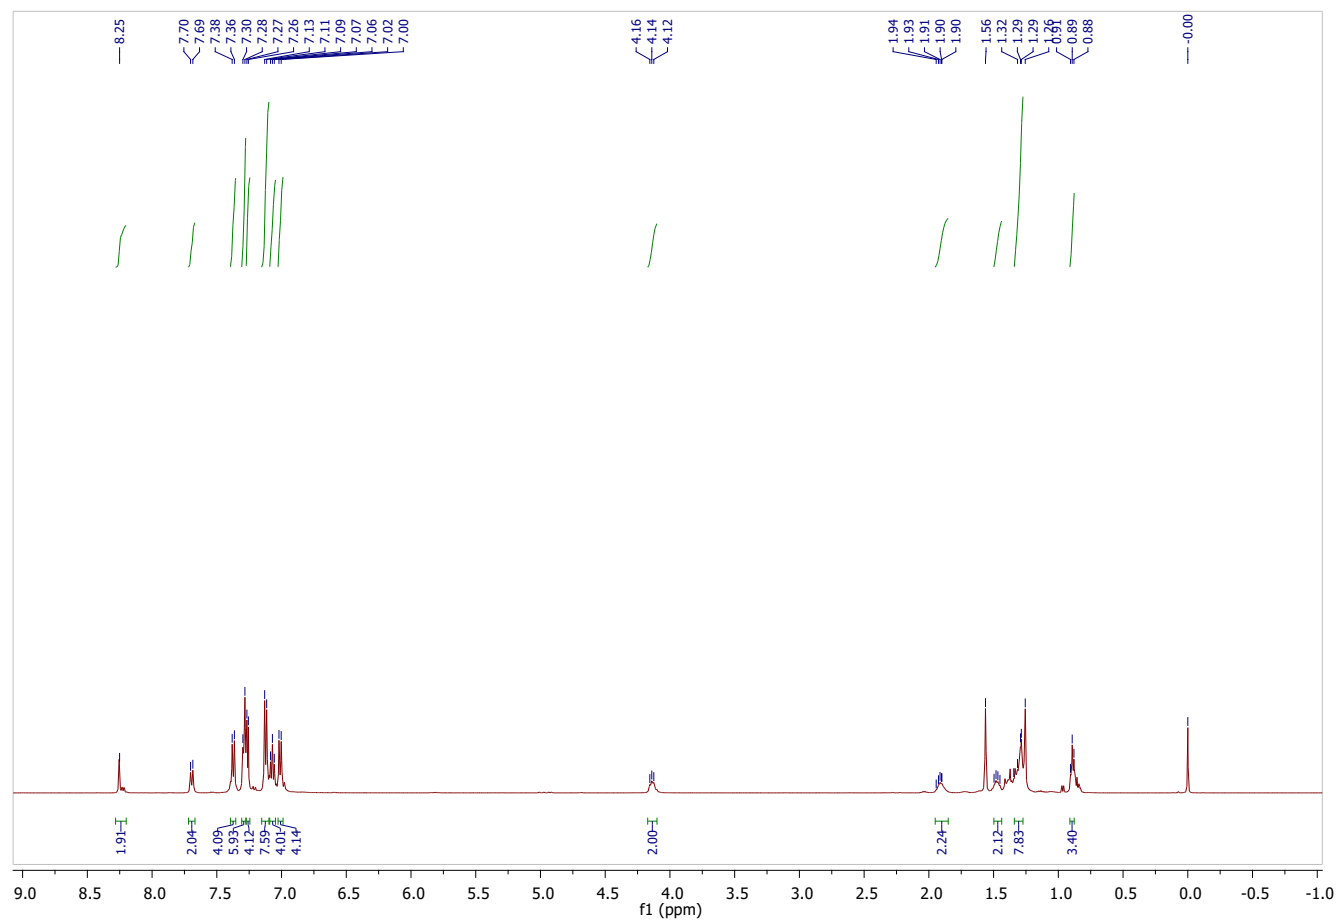

Fig. S6 <sup>1</sup>H-NMR of TPA1

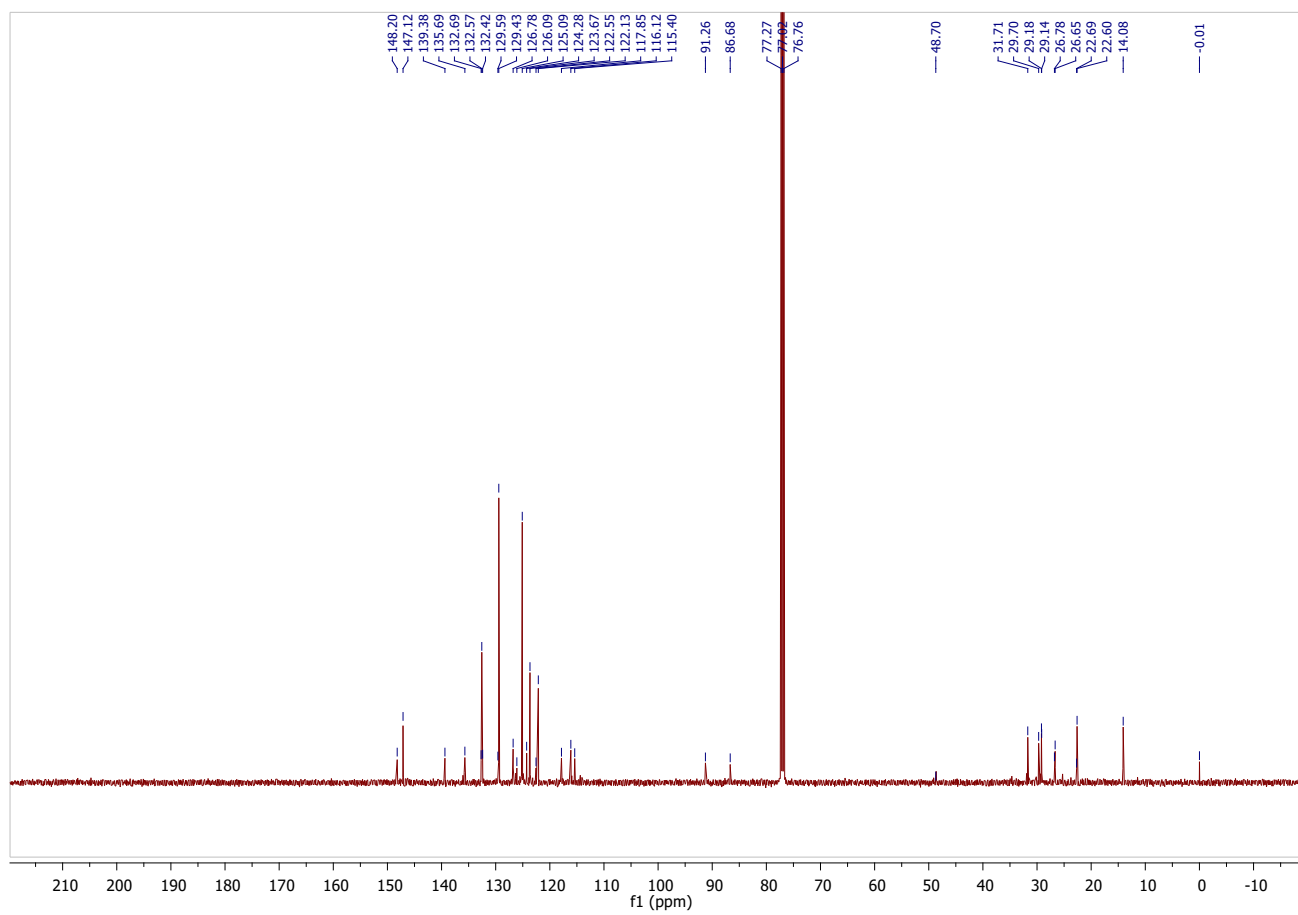

**Fig. S7**  $^{13}\text{C}$ -NMR of TPA1



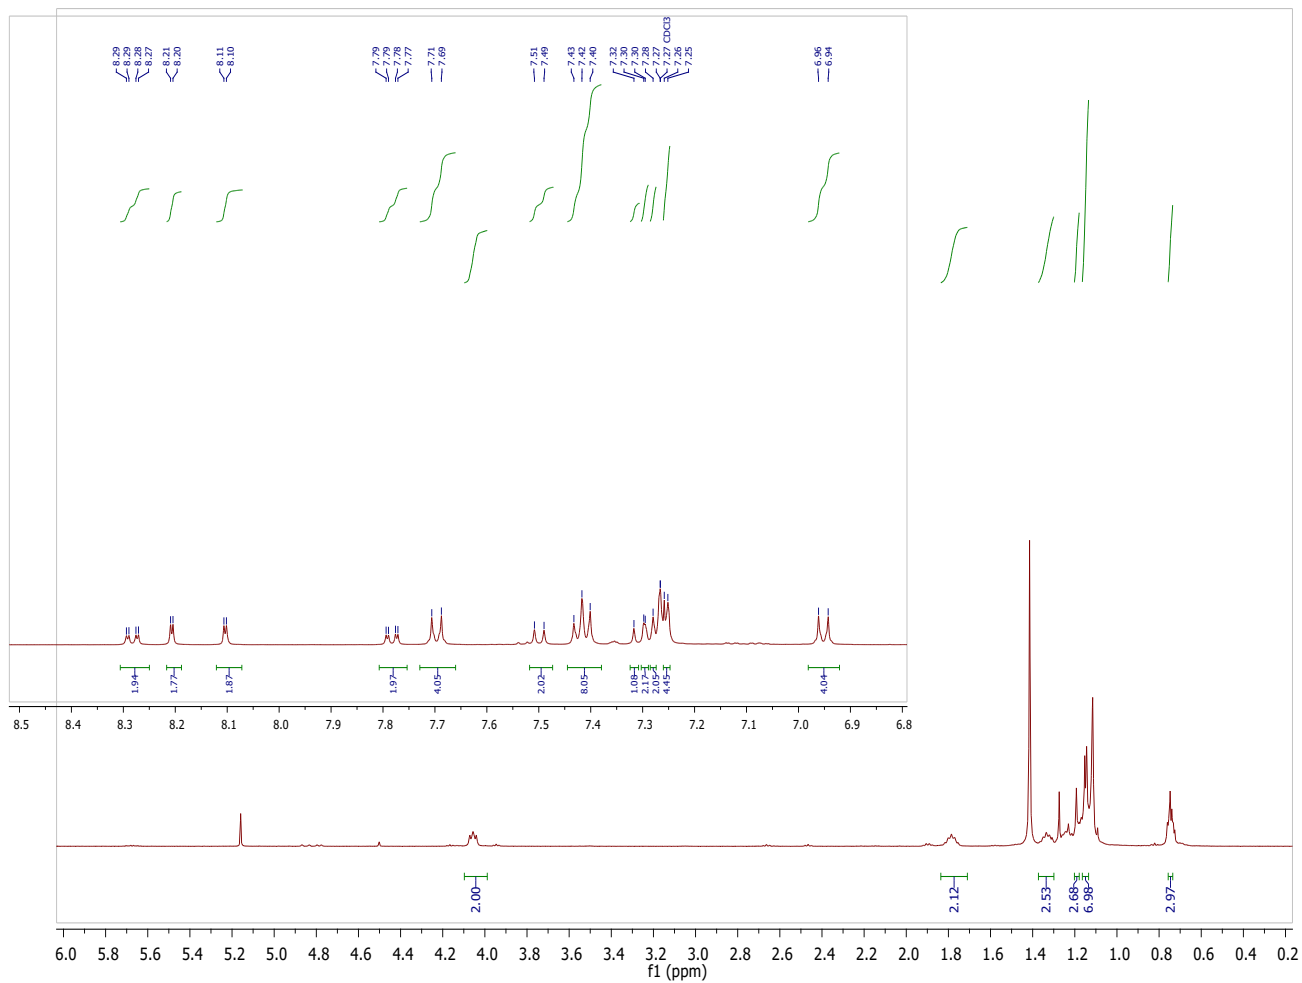

**Fig. S8 <sup>1</sup>H-NMR of TPA2**

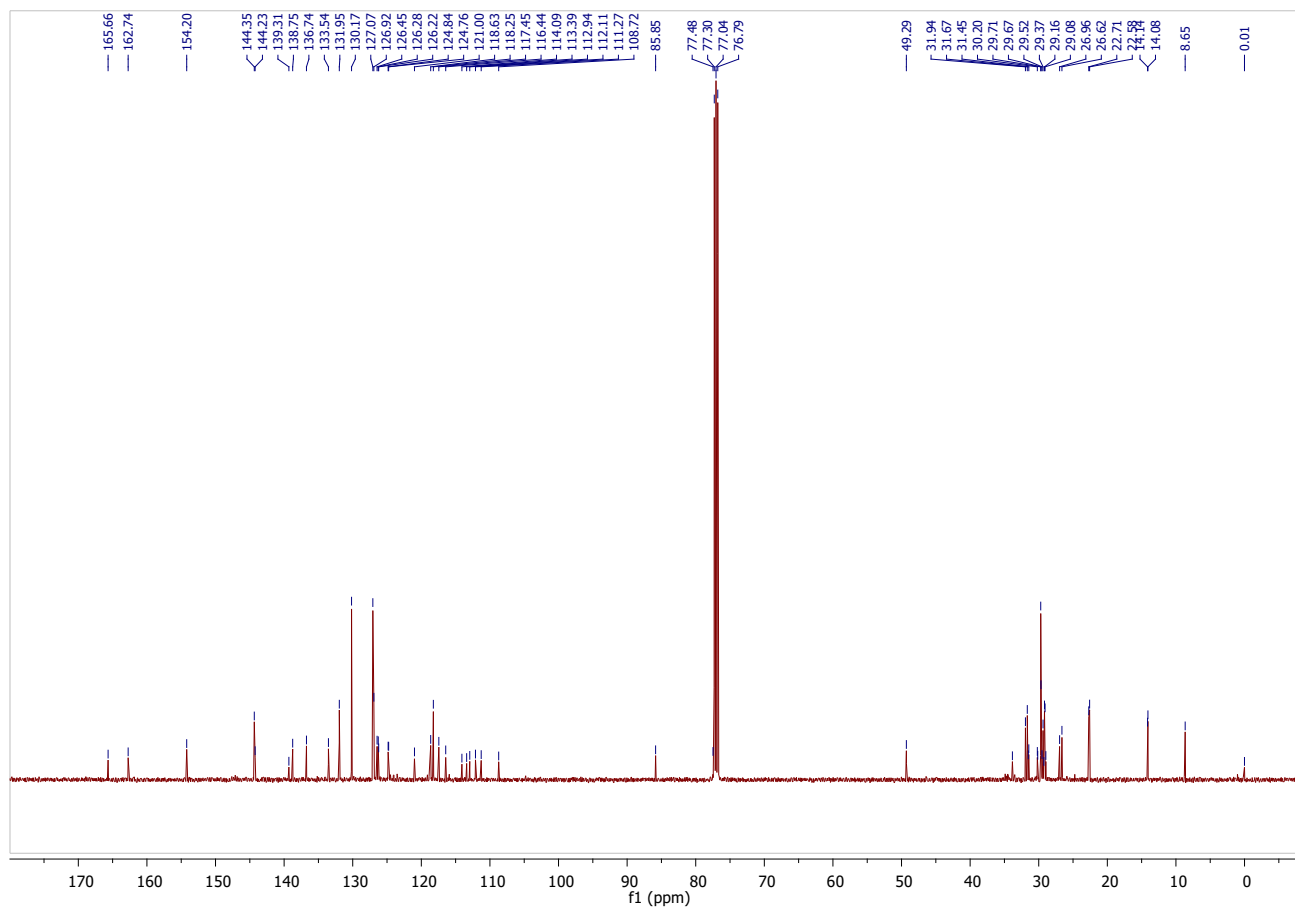

Fig. S9  $^{13}\text{C}$ -NMR of TPA2

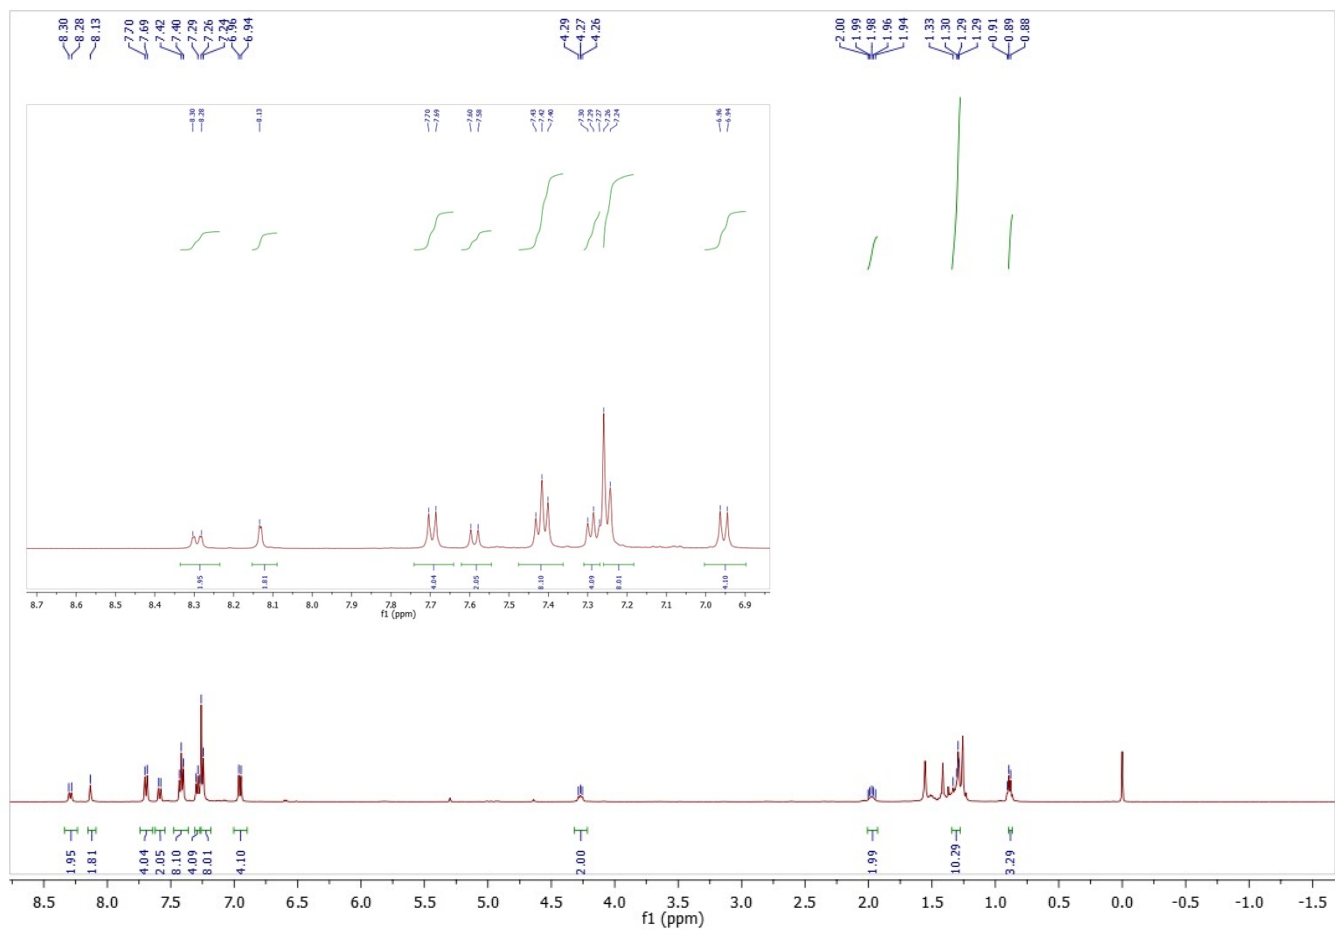

**Fig. S10  $^1\text{H-NMR}$  of TPA3**

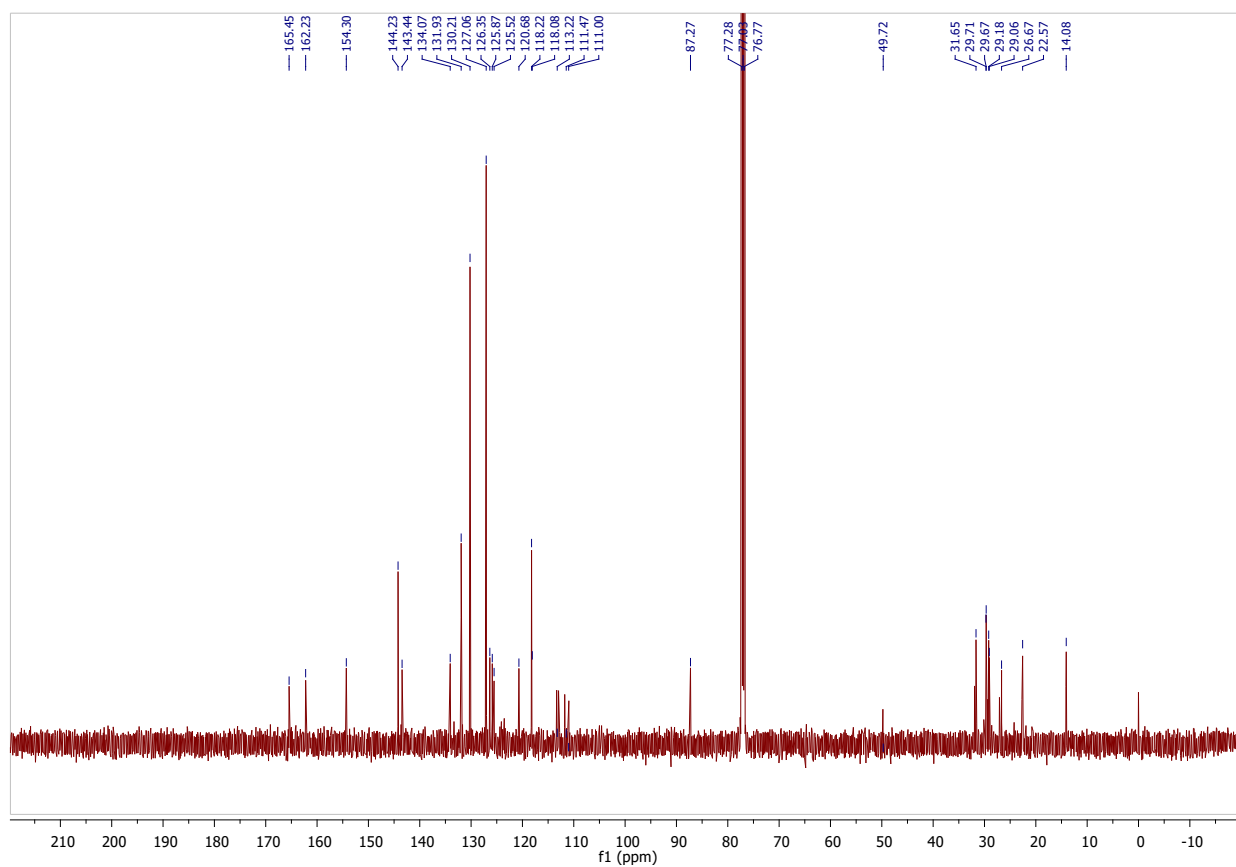

**Fig. S11**  $^{13}\text{C}$ -NMR of TPA3

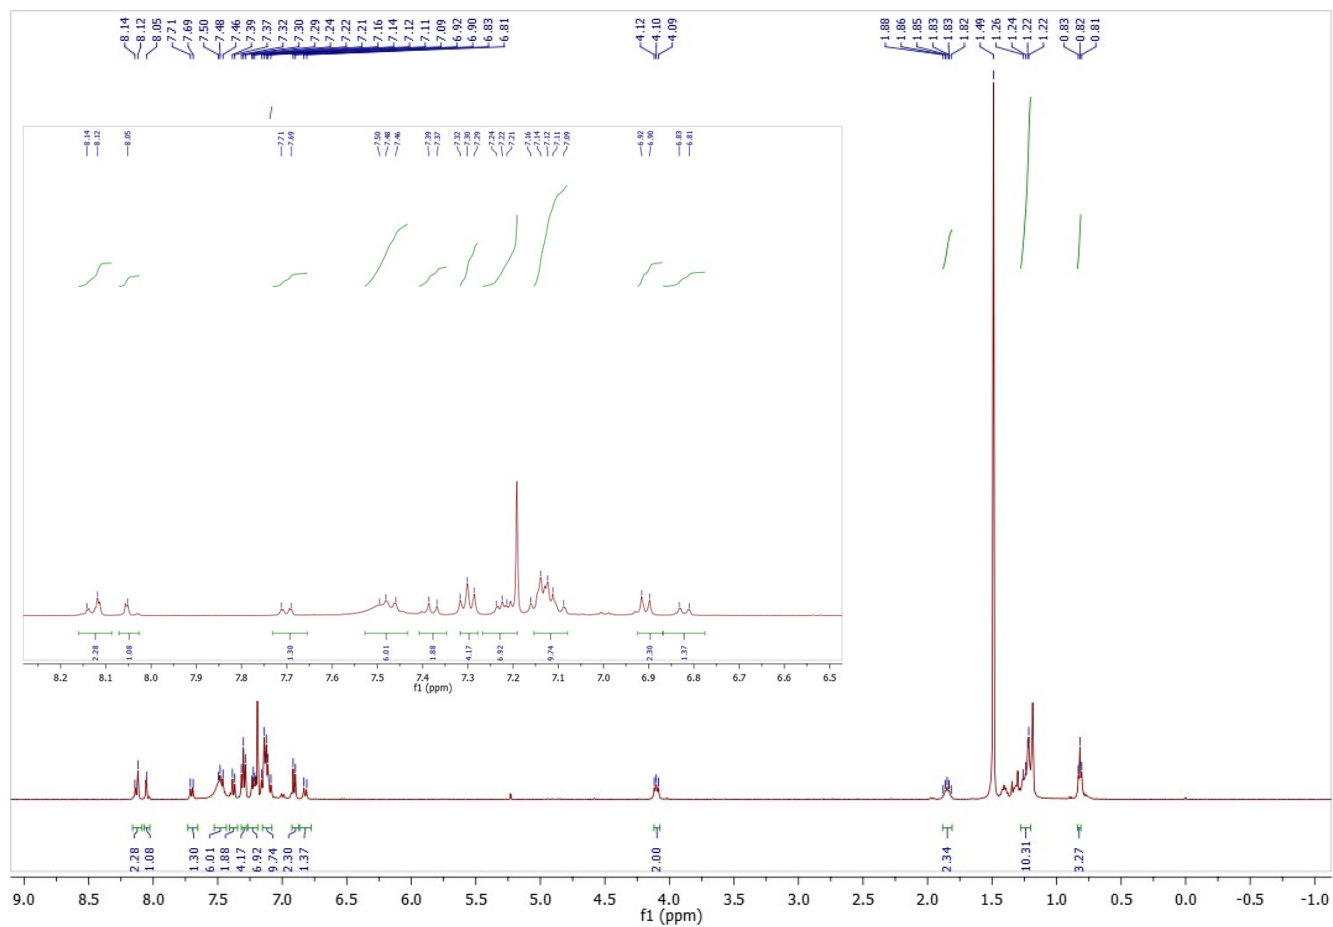

Fig. S12  $^1\text{H-NMR}$  of TPA4

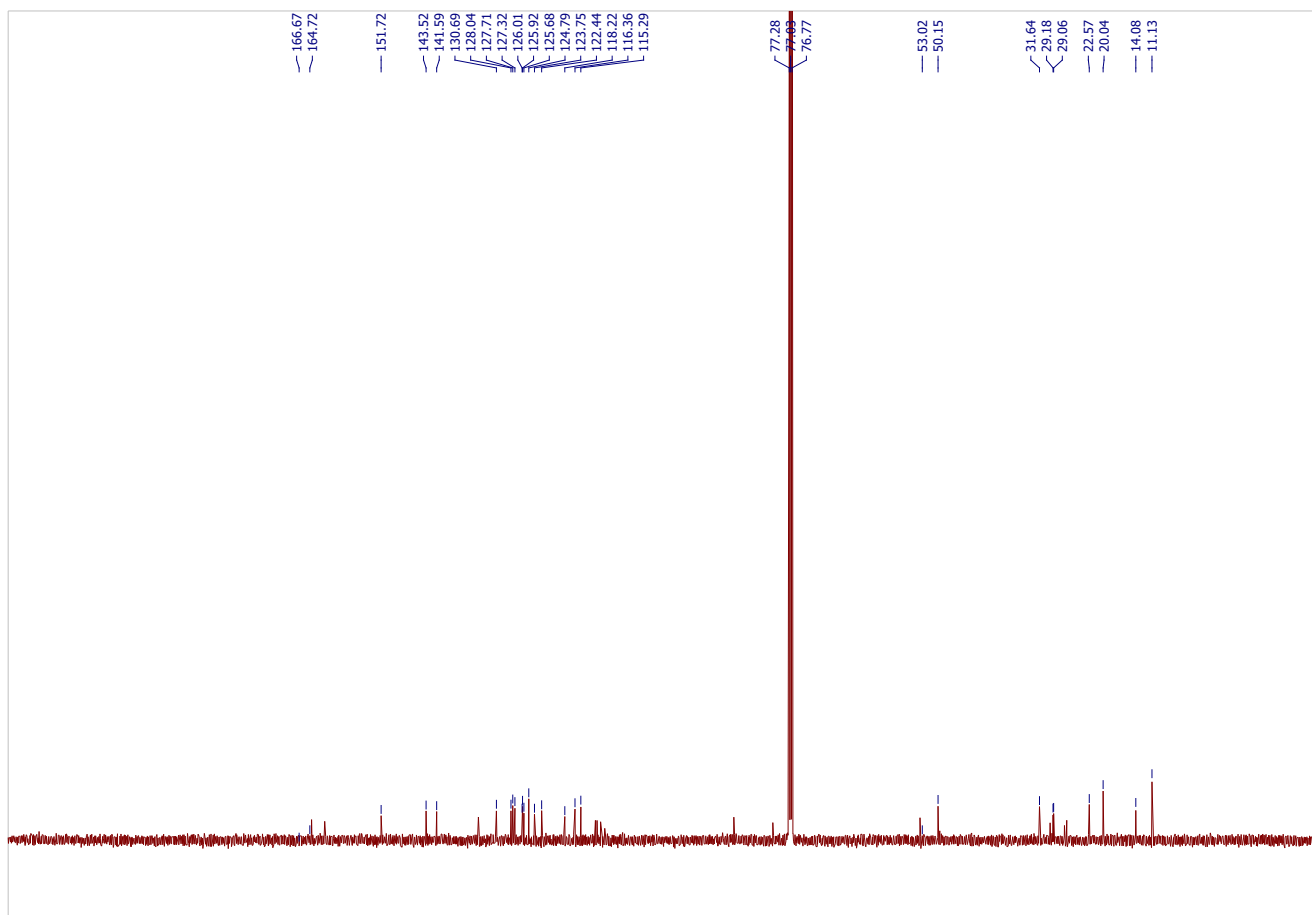

Fig. S13  $^{13}\text{C}$ -NMR of TPA4

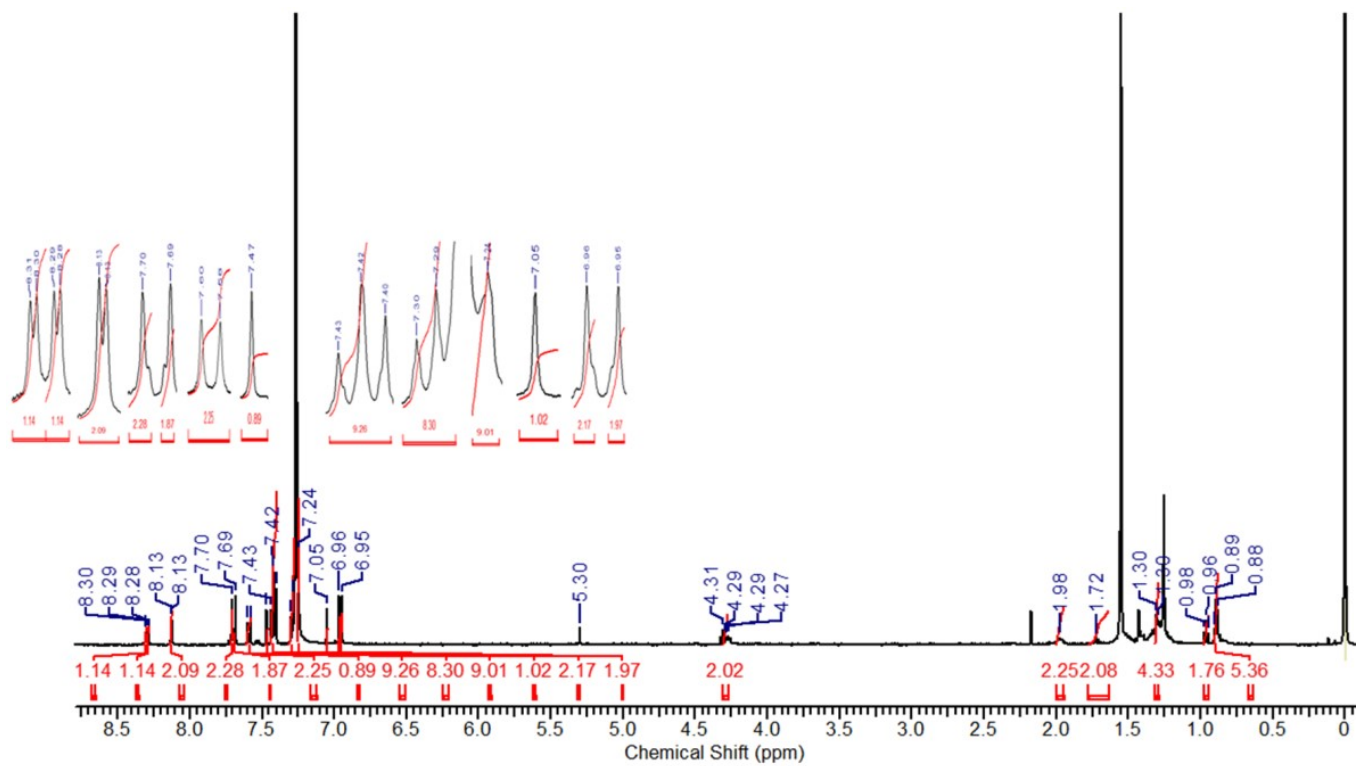

Fig. S14 <sup>1</sup>H-NMR of TPA5

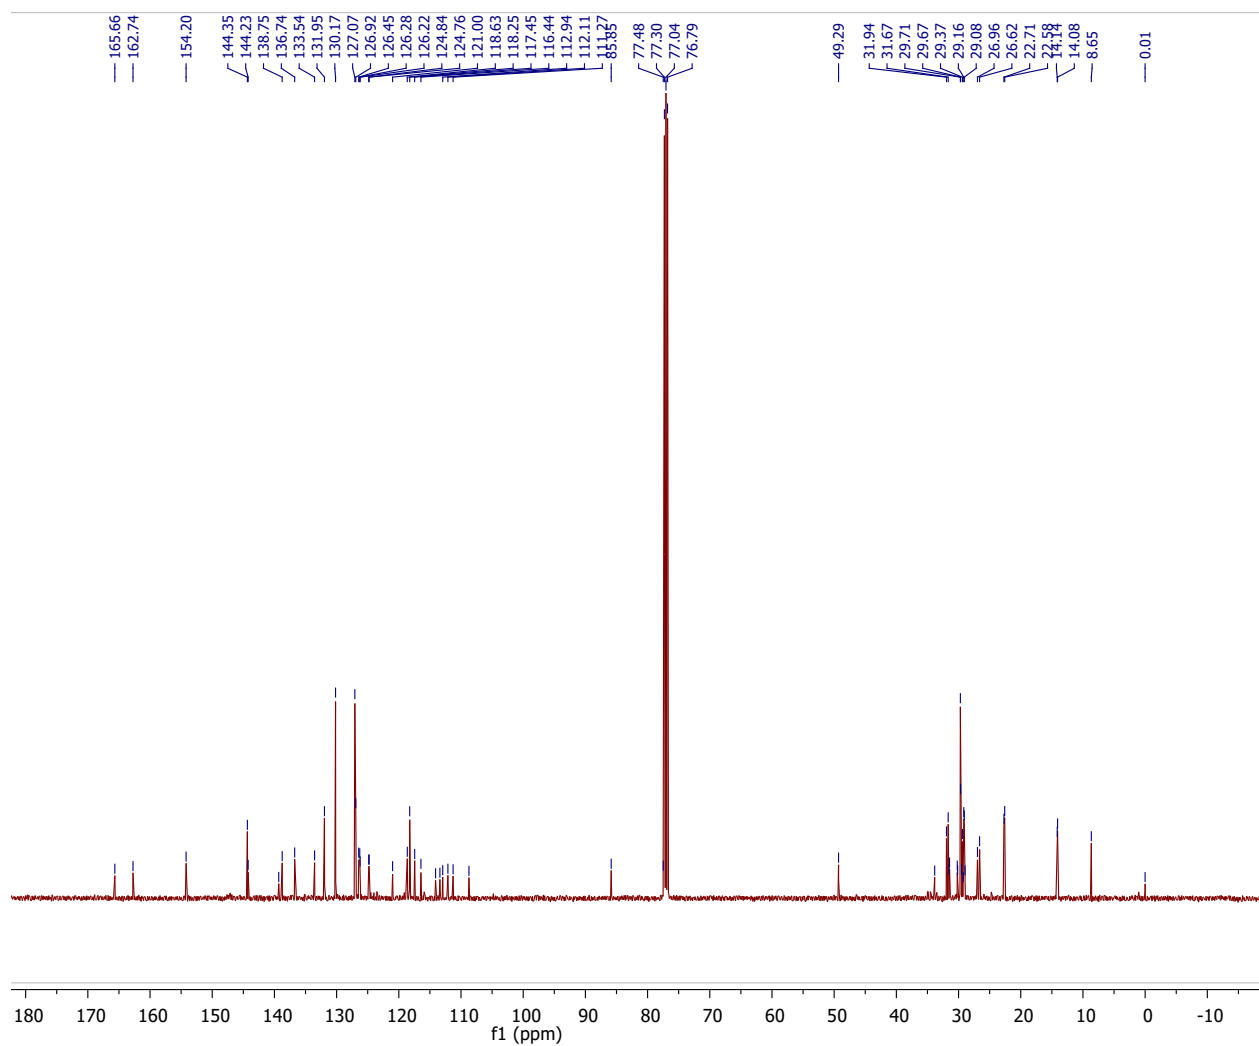

Fig. S15  $^{13}\text{C}$ -NMR of TPA5



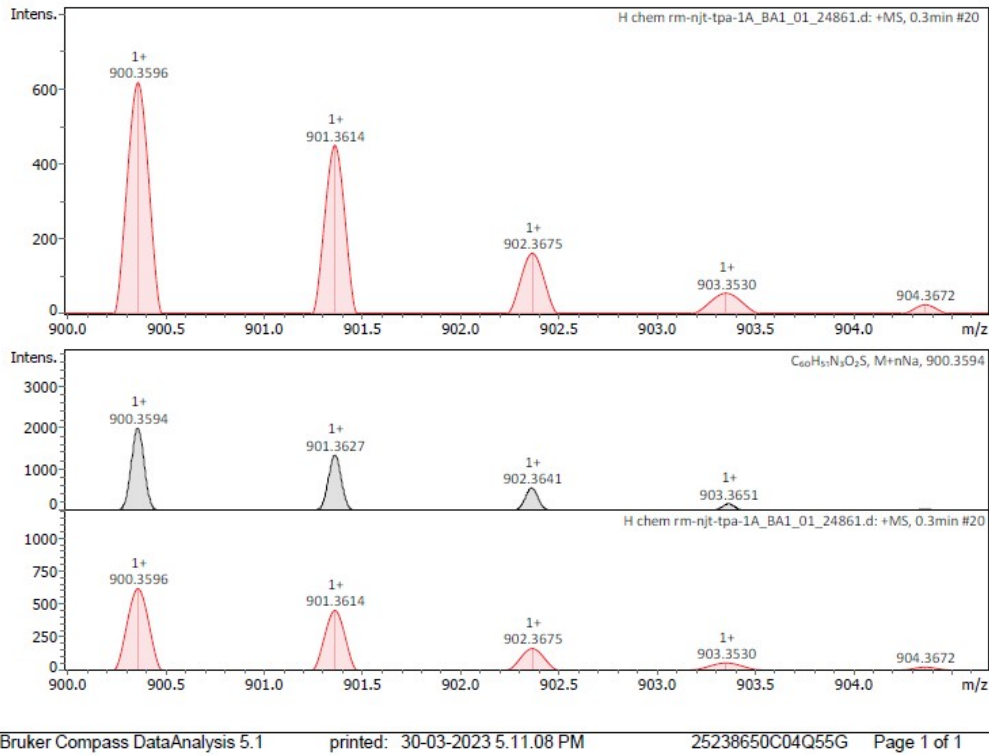

Bruker Compass DataAnalysis 5.1 printed: 30-03-2023 5.11.08 PM 25238650C04Q55G Page 1 of 1

**Fig. S16 HRMS of TPA1**

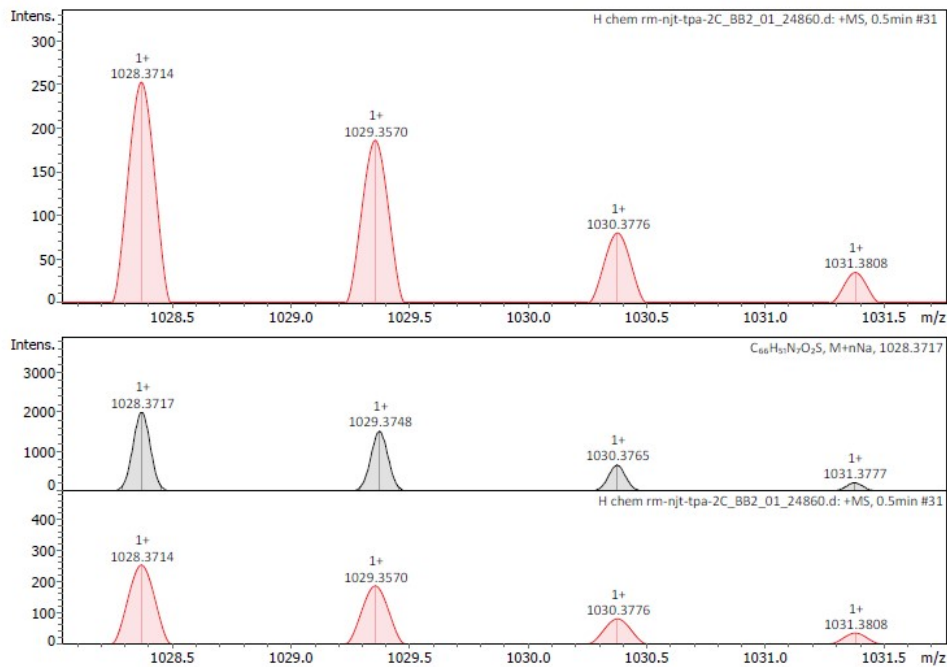

Bruker Compass DataAnalysis 5.1 printed: 30-03-2023 5.21.10 PM 25238650C04Q55G Page 1 of 1

**Fig. S17 HRMS of TPA2**

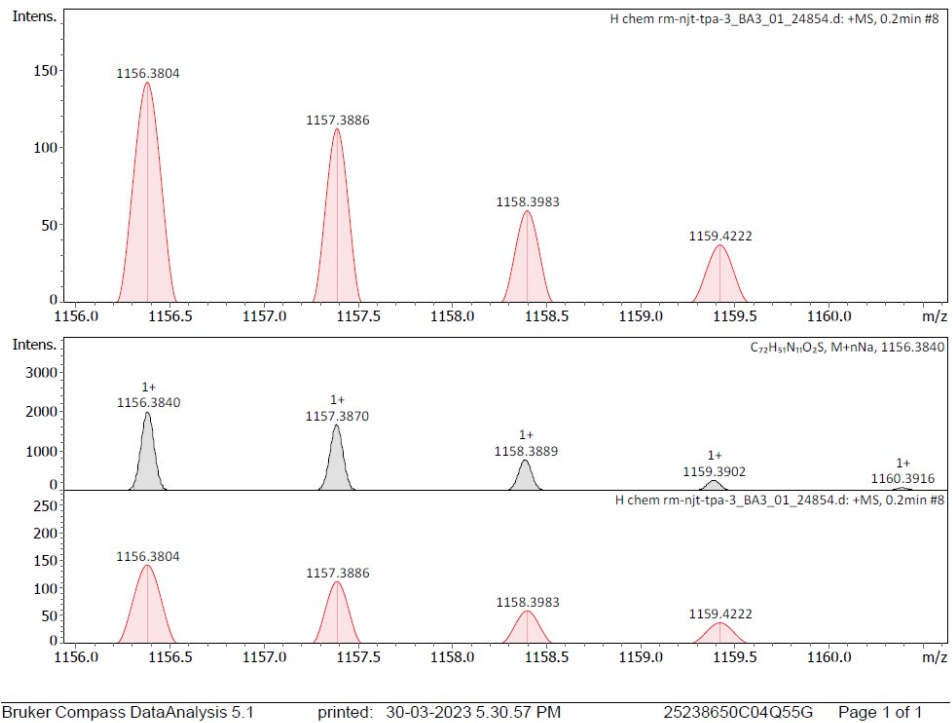

Bruker Compass DataAnalysis 5.1 printed: 30-03-2023 5.30.57 PM 25238650C04Q55G Page 1 of 1

**Fig. S18 HRMS of TPA3**

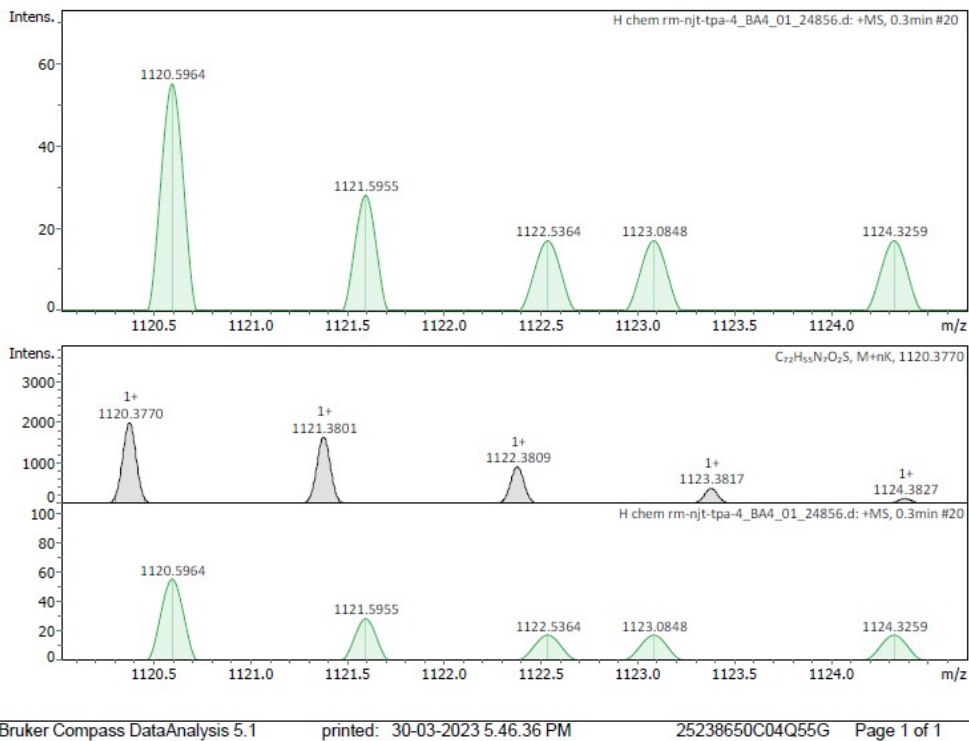

Bruker Compass DataAnalysis 5.1 printed: 30-03-2023 5.46.36 PM 25238650C04Q55G Page 1 of 1

**Fig. S19 Mass of TPA4**

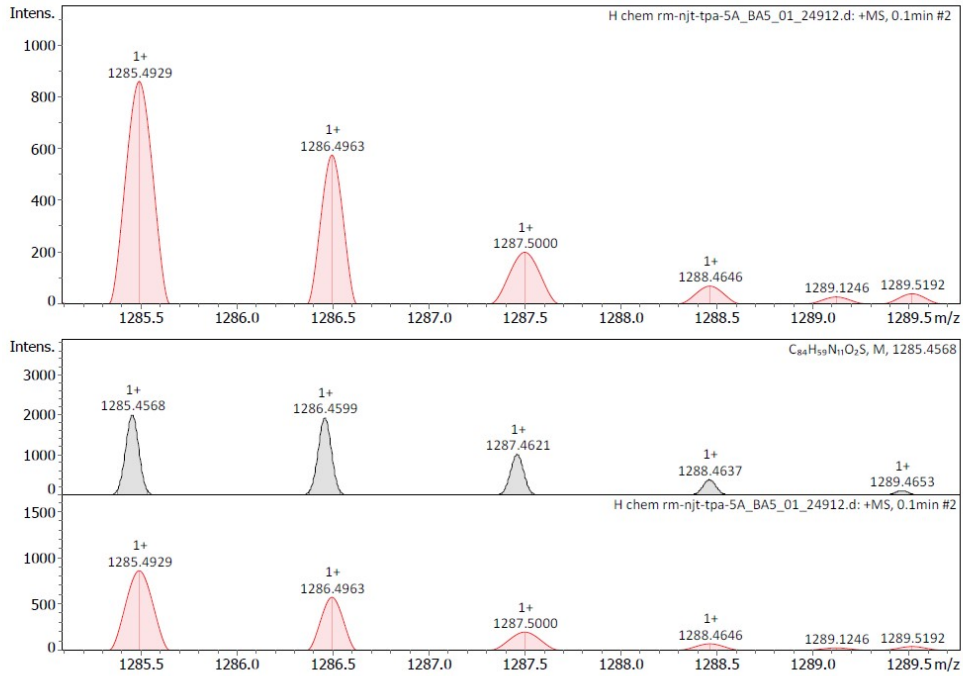

Bruker Compass DataAnalysis 5.1 printed: 30-03-2023 5.33.57 PM 25238650C04Q55G Page 1 of 1

**Fig. S20 Mass of TPA5**

Operator ID: SIC HIT Indore  
 Company name: Thermo Finnigan  
 Method filename: E:\Eager for FLASH\System defined methods\21. CHNS 9-11-2022\CHNS system12-11-202  
 Method name: NCHS  
 Analysed: 12-11-22 12:31  
 Printed: 11-12-2022 14:25  
 Elemental Analyser method:  
 Sampler method:  
 Sample ID: RM-MI-TPA-1  
 Analysis type: UnkNown  
 Chromatogram filename: E:\Eager for FLASH\System defined methods\21. CHNS 9-11-2022\DfchA020.DAT  
 Calibration method: Least Squares to Linear fit  
 Sample weight: 1.926  
 Protein factor: 6.25

| Component Name | Element % | Retention Time (min) | Area (.1 * uV * sec) | Area  |
|----------------|-----------|----------------------|----------------------|-------|
| Nitrogen       | 4.651     | 0.850                | 162453               | 51.40 |
| Carbon         | 80.258    | 1.183                | 8350391              | 1.000 |
| Hydrogen       | 5.372     | 3.433                | 1817787              | 4.593 |
| Sulphur        | 3.244     | 6.733                | 143529               | 58.17 |

**Fig. S21 Elemental analysis of TPA1**

Operator ID: SIC IIT Indore  
 Company name: Thermo Finnigan  
 Method filename: E:\Eager for FLASH\System defined methods\21. CHNS 9-11-2022\CHNS system12-11-202  
 Method name: NCHS  
 Analysed: 12-11-22 12:49  
 Printed: 11-12-2022 14:26  
 Elemental Analyser method:  
 Sampler method:  
 Sample ID: RM-MI-TPA-2  
 Analysis type: UnkNowm  
 Chromatogram filename: E:\Eager for FLASH\System defined methods\21. CHNS 9-11-2022\DfchA021.DAT  
 Calibration method: Least Squares to Linear fit  
 Sample weight: 1.807  
 Protein factor: 6.25

| Component Name | Element % | Retention Time (min) | Area (.1*uV*sec) | Area  |
|----------------|-----------|----------------------|------------------|-------|
| Nitrogen       | 9.080     | 0.842                | 324993           | 21.86 |
| Carbon         | 78.071    | 1.158                | 7105678          | 1.000 |
| Hydrogen       | 5.761     | 3.375                | 1828924          | 3.885 |
| Sulphur        | 3.052     | 6.717                | 134997           | 52.63 |

**Fig. S22 Elemental analysis of TPA2**

Operator ID: SIC IIT Indore  
 Company name: Thermo Finnigan  
 Method filename: E:\Eager for FLASH\System defined methods\21. CHNS 9-11-2022\CHNS system12-11-202  
 Method name: NCHS  
 Analysed: 12-11-22 13:06  
 Printed: 11-12-2022 14:27  
 Elemental Analyser method:  
 Sampler method:  
 Sample ID: RM-MI-TPA-3  
 Analysis type: UnkNowm  
 Chromatogram filename: E:\Eager for FLASH\System defined methods\21. CHNS 9-11-2022\DfchA022.DAT  
 Calibration method: Least Squares to Linear fit  
 Sample weight: 1.112  
 Protein factor: 6.25

| Component Name | Element % | Retention Time (min) | Area (.1*uV*sec) | Area  |
|----------------|-----------|----------------------|------------------|-------|
| Nitrogen       | 6.539     | 0.833                | 215109           | 17.01 |
| Carbon         | 75.664    | 1.208                | 3660886          | 1.000 |
| Hydrogen       | 4.221     | 3.250                | 824559           | 4.439 |
| Sulphur        | 2.833     | 6.742                | 49913            | 73.34 |

**Fig. S23 Elemental analysis of TPA3**

Operator ID: SIC IIT Indore  
 Company name: Thermo Finnigan  
 Method filename: E:\Eager for FLASH\System defined methods\21. CHNS 9-11-2022\CHNS system12-11-202  
 Method name: NCHS  
 Analysed: 12-11-22 13:18  
 Printed: 11-12-2022 14:27  
 Elemental Analyser method:  
 Sampler method:  
 Sample ID: RM-MI-TPA-4  
 Analysis type: UnkNown  
 Chromatogram filename: E:\Eager for FLASH\System defined methods\21. CHNS 9-11-2022\DfchA023.DAT  
 Calibration method: Least Squares to Linear fit  
 Sample weight: 2.055  
 Protein factor: 6.25

| Component Name | Element % | Retention Time (min) | Area (.1*uV*sec) | Area  |
|----------------|-----------|----------------------|------------------|-------|
| Nitrogen       | 9.394     | 0.825                | 1057398          | 7.915 |
| Carbon         | 79.573    | 1.142                | 8369432          | 1.000 |
| Hydrogen       | 5.210     | 3.225                | 1159020          | 7.221 |
| Sulphur        | 2.874     | 6.733                | 43984            | 190.2 |

**Fig. S24 Elemental analysis of TPA4**

Operator ID: SIC IIT Indore  
 Company name: Thermo Finnigan  
 Method filename: E:\Eager for FLASH\System defined methods\21. CHNS 9-11-2022\CHNS system12-11-202  
 Method name: NCHS  
 Analysed: 12-11-22 13:30  
 Printed: 11-12-2022 14:28  
 Elemental Analyser method:  
 Sampler method:  
 Sample ID: RM-MI-TPA-5  
 Analysis type: UnkNown  
 Chromatogram filename: E:\Eager for FLASH\System defined methods\21. CHNS 9-11-2022\DfchA024.DAT  
 Calibration method: Least Squares to Linear fit  
 Sample weight: 1.895  
 Protein factor: 6.25

| Component Name | Element % | Retention Time (min) | Area (.1*uV*sec) | Area  |
|----------------|-----------|----------------------|------------------|-------|
| Nitrogen       | 10.849    | 0.833                | 608151           | 12.41 |
| Carbon         | 77.990    | 1.175                | 7549396          | 1.000 |
| Hydrogen       | 4.799     | 3.325                | 1597777          | 4.724 |
| Sulphur        | 2.493     | 6.692                | 69257            | 109.0 |

**Fig. S25 Elemental analysis of TPA5**

# TDDFT Calculations

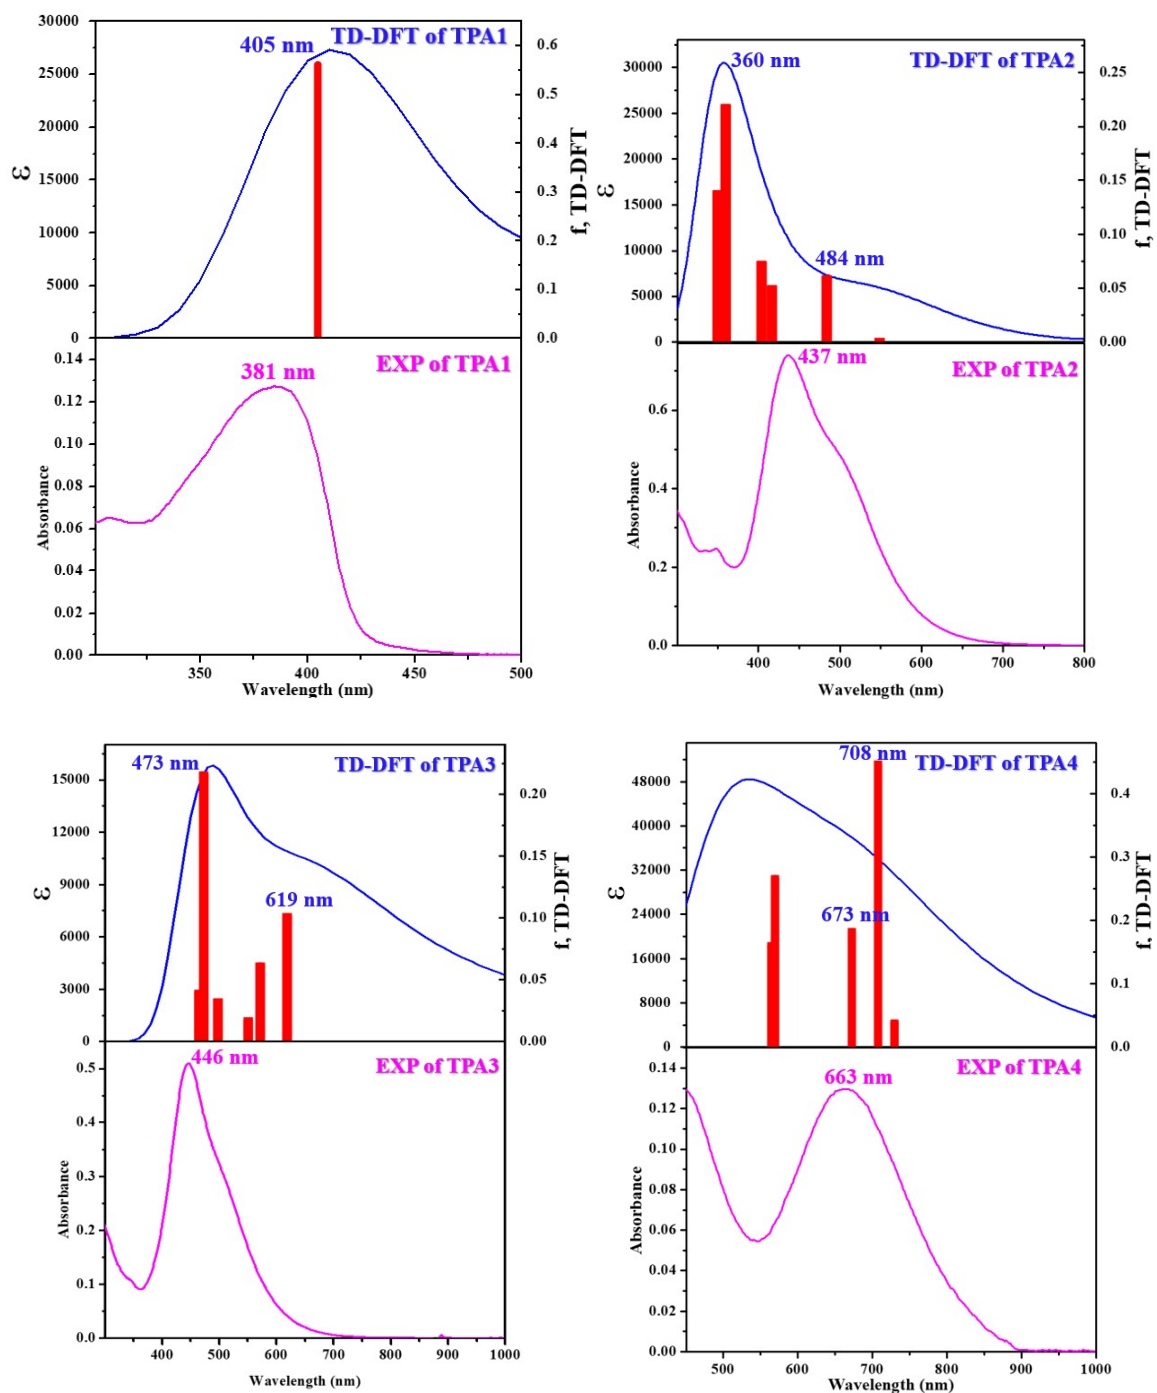

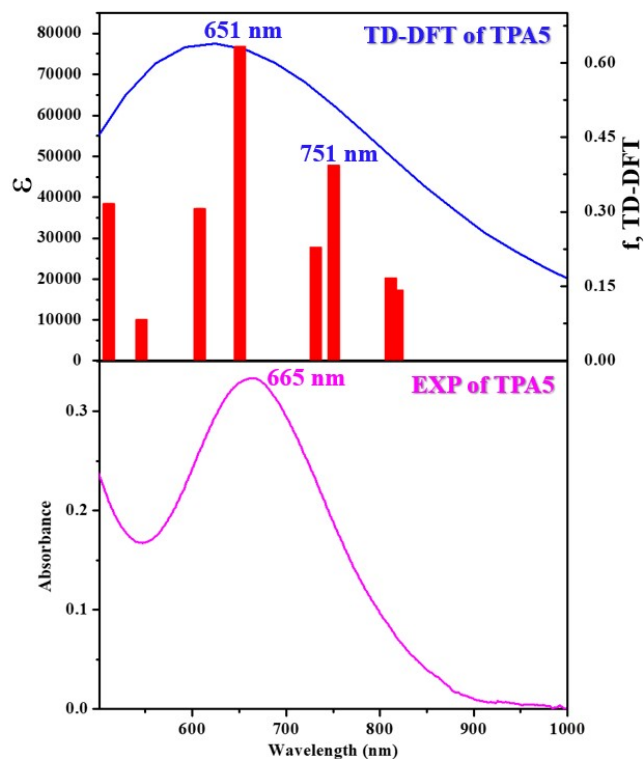

**Fig. S26** Experimental (bottom) and TDDFT-predicted (top) UV-Vis absorption spectra of TPA1–TPA5 in DCM.

### TD-DFT Calculation data

Calculation method: B3LYP/6-31G(d,p) and CAM-B3LYP/6-31G(d,p) level in dichloromethane solvent.

### TD-DFT of TPA1 in DCM solvent.

Calculation method: B3LYP/6-31G(d,p)

Excitation energies and oscillator strengths:

Excited State 1: Singlet-A 0.7345 eV 1688.10 nm  $f=0.0900$   $\langle S^{*2} \rangle=0.000$   
 205 -> 213 -0.16228

212 -> 213 0.89374

212 <- 213 -0.59222

This state for optimization and/or second-order correction.

Total Energy, E(TD-HF/TD-KS) = -2832.47026288

Copying the excited state density for this state as the 1-particle RhoCI density.

Excited State 2: Singlet-A 0.9053 eV 1369.47 nm f=0.0003 <S\*\*2>=0.000

211 -> 213 0.70299

Excited State 3: Singlet-A 1.2730 eV 973.97 nm f=0.0276 <S\*\*2>=0.000

207 -> 213 0.14094

208 -> 213 0.22684

209 -> 213 0.33602

210 -> 213 0.54622

Excited State 4: Singlet-A 1.4241 eV 870.62 nm f=0.0036 <S\*\*2>=0.000

207 -> 213 -0.23578

208 -> 213 -0.37720

209 -> 213 -0.32816

210 -> 213 0.43054

Excited State 5: Singlet-A 1.5782 eV 785.63 nm f=0.0205 <S\*\*2>=0.000

202 -> 213 -0.22569

203 -> 213 -0.19328

205 -> 213 0.62440



212 -> 213 0.15530

212 <- 213 -0.11232

Excited State 6: Singlet-A 1.7230 eV 719.56 nm f=0.0617 <S\*\*2>=0.000

206 -> 213 -0.11738

207 -> 213 -0.29436

208 -> 213 -0.33444

209 -> 213 0.51474

Excited State 7: Singlet-A 1.7528 eV 707.34 nm f=0.0635 <S\*\*2>=0.000

210 -> 214 0.15729

211 -> 214 0.67298

Excited State 8: Singlet-A 1.8047 eV 687.02 nm f=0.0048 <S\*\*2>=0.000

202 -> 213 -0.33299

203 -> 213 0.61437

Excited State 9: Singlet-A 1.8735 eV 661.77 nm f=0.1953 <S\*\*2>=0.000

202 -> 213 0.20427

204 -> 213 0.10052

205 -> 213 0.15529

206 -> 213 0.46498

207 -> 213 0.26697

208 -> 213 -0.34720

Excited State 10: Singlet-A 2.0189 eV 614.13 nm f=0.1118 <S\*\*2>=0.000

199 -> 213 0.10578

202 -> 213 0.49689

203 -> 213 0.25375

205 -> 213 0.20683

207 -> 213 -0.22715

208 -> 213 0.12646

212 -> 213 0.28566

212 <- 213 -0.21831

Excited State 11: Singlet-A 2.0764 eV 597.10 nm f=0.0124 <S\*\*2>=0.000

200 -> 213 -0.12256

202 -> 213 0.11116

204 -> 213 -0.11500

206 -> 213 -0.43890

207 -> 213 0.44951

208 -> 213 -0.22090

Excited State 12: Singlet-A 2.1831 eV 567.92 nm f=0.0000 <S\*\*2>=0.000

212 -> 214 0.70698

Excited State 13: Singlet-A 2.2399 eV 553.53 nm f=0.0147 <S\*\*2>=0.000

199 -> 213 0.36906

200 -> 213 0.55795

204 -> 213 0.12345

206 -> 213 -0.12005

Excited State 14: Singlet-A 2.3867 eV 519.49 nm f=0.0011 <S\*\*2>=0.000

199 -> 213 -0.18133

204 -> 213 0.65573

206 -> 213 -0.13711

Excited State 15: Singlet-A 2.4265 eV 510.97 nm f=0.0072 <S\*\*2>=0.000

208 -> 214 0.24741

209 -> 214 -0.37832

210 -> 214 0.51097

Excited State 16: Singlet-A 2.6039 eV 476.14 nm f=0.0096 <S\*\*2>=0.000

195 -> 213 -0.35834

196 -> 213 0.40193

212 -> 215 0.16936

212 -> 216 0.40082

Excited State 17: Singlet-A 2.6382 eV 469.97 nm f=0.0000 <S\*\*2>=0.000

201 -> 213 0.70415

Excited State 18: Singlet-A 2.6562 eV 466.78 nm f=0.0009 <S\*\*2>=0.000

198 -> 213 0.19688

199 -> 213 0.50089

200 -> 213 -0.37479

204 -> 213 0.15186

212 -> 216 0.10887

Excited State 19: Singlet-A 2.6823 eV 462.24 nm f=0.0040 <S\*\*2>=0.000

195 -> 213 0.28918

196 -> 213 -0.31888

212 -> 215 0.22122

212 -> 216 0.48818

Excited State 20: Singlet-A 2.7658 eV 448.28 nm f=0.1104 <S\*\*2>=0.000

206 -> 214 -0.18869

207 -> 214 0.33659

208 -> 214 -0.35324

209 -> 214 0.20470

210 -> 214 0.37385

211 -> 214 -0.16039

Excited State 21: Singlet-A 2.8726 eV 431.61 nm f=0.0007 <S\*\*2>=0.000

197 -> 213 0.10593

198 -> 213 0.63889

199 -> 213 -0.23690

Excited State 22: Singlet-A 2.9292 eV 423.27 nm f=0.0256 <S\*\*2>=0.000

212 -> 215 0.63325

212 -> 216 -0.27768

Excited State 23: Singlet-A 2.9725 eV 417.10 nm f=0.0121 <S\*\*2>=0.000

190 -> 213 0.15595

192 -> 213 -0.14763

193 -> 213 -0.12627

194 -> 213 0.20772

195 -> 213 0.32928

196 -> 213 0.37430

197 -> 213 0.31808

198 -> 213 -0.16161

Excited State 24: Singlet-A 3.0053 eV 412.55 nm f=0.0030 <S\*\*2>=0.000

193 -> 213 0.10368

195 -> 213 -0.19236

196 -> 213 -0.23184

197 -> 213 0.61574

Excited State 25: Singlet-A 3.0588 eV 405.34 nm f=0.5600 <S\*\*2>=0.000

204 -> 214 -0.22922

206 -> 214 0.21212

207 -> 214 -0.24763

209 -> 214 0.25791

210 -> 214 0.15794

211 -> 215 0.43891

211 -> 216 -0.10111

## TD-DFT of TPA2 in DCM solvent.

Calculation method: B3LYP/6-31G(d,p)

Excitation energies and oscillator strengths:

Excited State 1: Singlet-A 2.1803 eV 568.66 nm f=0.0950 <S\*\*2>=0.000

243 -> 245 0.70543

This state for optimization and/or second-order correction.

Total Energy, E(TD-HF/TD-KS) = -3280.50257660

Copying the excited state density for this state as the 1-particle RhoCI density.

Excited State 2: Singlet-A 2.2555 eV 549.70 nm f=0.0021 <S\*\*2>=0.000

244 -> 245 0.70236

Excited State 3: Singlet-A 2.5442 eV 487.33 nm f=0.0601 <S\*\*2>=0.000

243 -> 246 0.70319

Excited State 4: Singlet-A 2.6073 eV 475.53 nm f=0.0259 <S\*\*2>=0.000

242 -> 245 0.66579

244 -> 246 -0.18115

Excited State 5: Singlet-A 2.6266 eV 472.02 nm f=0.0012 <S\*\*2>=0.000

242 -> 245 0.18187

244 -> 246 0.67666

Excited State 6: Singlet-A 2.9682 eV 417.71 nm f=0.0508 <S\*\*2>=0.000

242 -> 246 0.67969

Excited State 7: Singlet-A 2.9937 eV 414.16 nm f=0.0056 <S\*\*2>=0.000

233 -> 245 -0.10411

236 -> 245 0.12216

239 -> 245 0.16659

240 -> 245 0.66217

Excited State 8: Singlet-A 3.0503 eV 406.46 nm f=0.0555 <S\*\*2>=0.000

235 -> 245 -0.17250

236 -> 245 0.20753

237 -> 245 -0.12134

238 -> 245 0.17802

239 -> 245 0.46164

240 -> 245 -0.15050

241 -> 245 -0.33297

Excited State 9: Singlet-A 3.0620 eV 404.91 nm f=0.0734 <S\*\*2>=0.000

233 -> 245 0.10345

235 -> 245 -0.17107

236 -> 245 -0.25619

237 -> 245 -0.12454

238 -> 245 0.39923

239 -> 245 -0.30156

240 -> 245 0.17554

241 -> 245 -0.28299

Excited State 10: Singlet-A 3.1277 eV 396.41 nm f=0.0186 <S\*\*2>=0.000

236 -> 245 0.57954

238 -> 245 0.14862

239 -> 245 -0.34596

Excited State 11: Singlet-A 3.2193 eV 385.13 nm f=0.0068 <S\*\*2>=0.000

233 -> 245 0.11947

235 -> 245 -0.14466

237 -> 245 -0.12569

238 -> 245 0.35437

239 -> 245 0.15122

241 -> 245 0.54119

Excited State 12: Singlet-A 3.2558 eV 380.80 nm f=0.0190 <S\*\*2>=0.000

233 -> 245 0.64373

236 -> 245 0.13547

236 -> 246 0.10134

238 -> 245 -0.13326

Excited State 13: Singlet-A 3.3020 eV 375.48 nm f=0.0002 <S\*\*2>=0.000

237 -> 245 0.65353

238 -> 245 0.25328



Excited State 14: Singlet-A 3.3702 eV 367.89 nm f=0.0315 <S\*\*2>=0.000

232 -> 245 -0.14016

233 -> 245 -0.10986

236 -> 246 0.22995

239 -> 246 0.25839

240 -> 246 0.56653

Excited State 15: Singlet-A 3.3894 eV 365.80 nm f=0.0235 <S\*\*2>=0.000

231 -> 245 -0.16691

235 -> 245 0.48114

235 -> 246 -0.12399

237 -> 245 -0.13155

238 -> 245 0.22672

238 -> 246 0.17901

239 -> 246 0.12120

240 -> 246 -0.16746

241 -> 246 -0.19366

Excited State 16: Singlet-A 3.4059 eV 364.03 nm f=0.0217 <S\*\*2>=0.000

232 -> 245 0.31064

232 -> 246 0.10335

235 -> 245 0.17178

236 -> 246 -0.34705

239 -> 246 -0.27529

240 -> 246 0.36576

Excited State 17: Singlet-A 3.4329 eV 361.16 nm f=0.2187 <S\*\*2>=0.000

232 -> 245 -0.16012

234 -> 245 -0.13813

235 -> 245 0.32356

235 -> 246 0.19440

237 -> 246 0.13846

238 -> 246 -0.32782

241 -> 246 0.36022

Excited State 18: Singlet-A 3.4424 eV 360.17 nm f=0.0085 <S\*\*2>=0.000

234 -> 245 0.69081

Excited State 19: Singlet-A 3.4878 eV 355.47 nm f=0.0366 <S\*\*2>=0.000

232 -> 245 0.37252

236 -> 246 -0.14397

238 -> 246 -0.24522

239 -> 246 0.49815

Excited State 20: Singlet-A 3.5416 eV 350.08 nm f=0.1388 <S\*\*2>=0.000

232 -> 245 0.41271

233 -> 246 -0.16745

236 -> 246 0.49267

239 -> 246 -0.18300

Excited State 21: Singlet-A 3.5899 eV 345.37 nm f=0.0234 <S\*\*2>=0.000

233 -> 246 0.10911

235 -> 246 -0.14266

237 -> 246 -0.11923

238 -> 246 0.33000

239 -> 246 0.13922

241 -> 246 0.54580

Excited State 22: Singlet-A 3.6347 eV 341.11 nm f=0.0906 <S\*\*2>=0.000

231 -> 245 0.12269

233 -> 246 -0.14761

242 -> 247 -0.17387

244 -> 247 0.63015

244 -> 248 -0.11831

Excited State 23: Singlet-A 3.6467 eV 339.99 nm f=0.0692 <S\*\*2>=0.000

232 -> 245 0.14345

233 -> 246 0.62714

236 -> 246 0.12228

238 -> 246 -0.16217

244 -> 247 0.13349

Excited State 24: Singlet-A 3.6732 eV 337.54 nm f=0.0228 <S\*\*2>=0.000

231 -> 245 0.43774

235 -> 245 0.12507

237 -> 246 0.40726

238 -> 246 0.28817

Excited State 25: Singlet-A 3.6777 eV 337.12 nm f=0.0341 <S\*\*2>=0.000

231 -> 245 -0.42998

235 -> 245 -0.11782

237 -> 246 0.51821

### **TD-DFT of TPA3 in DCM solvent.**

Calculation method: B3LYP/6-31G(d,p)

Excitation energies and oscillator strengths:

Excited State 1: Singlet-A 0.8218 eV 1508.67 nm f=0.0010 <S\*\*2>=0.000

276 -> 277 -0.25452

276 -> 278 0.66207

276 <- 277 0.12790

This state for optimization and/or second-order correction.

Total Energy, E(TD-HF/TD-KS) = -3727.70824589

Copying the excited state density for this state as the 1-particle RhoCI density.

Excited State 2: Singlet-A 1.0307 eV 1202.94 nm f=0.0310 <S\*\*2>=0.000

273 -> 277 0.35117

276 -> 277 0.77031

276 -> 278 0.21301

276 <- 277 -0.51622

Excited State 3: Singlet-A 1.2011 eV 1032.23 nm f=0.0000 <S\*\*2>=0.000

276 -> 279 0.70132

Excited State 4: Singlet-A 1.3936 eV 889.65 nm f=0.0382 <S\*\*2>=0.000

273 -> 277 0.60477

276 -> 277 -0.51303

276 <- 277 0.38041

Excited State 5: Singlet-A 1.5072 eV 822.61 nm f=0.0001 <S\*\*2>=0.000

275 -> 277 0.70631

Excited State 6: Singlet-A 1.6458 eV 753.34 nm f=0.0612 <S\*\*2>=0.000

274 -> 279 0.39329

275 -> 278 -0.13757

275 -> 279 0.56250

Excited State 7: Singlet-A 1.7081 eV 725.86 nm f=0.0071 <S\*\*2>=0.000

276 -> 280 0.69759

Excited State 8: Singlet-A 1.7674 eV 701.51 nm f=0.0530 <S\*\*2>=0.000

274 -> 277 0.24968

274 -> 278 -0.10368

274 -> 279 0.52504

275 -> 278 0.14824

275 -> 279 -0.35155

Excited State 9: Singlet-A 1.7751 eV 698.45 nm f=0.0064 <S\*\*2>=0.000

274 -> 277 0.66058

274 -> 279 -0.20485

275 -> 279 0.12246

Excited State 10: Singlet-A 1.8284 eV 678.08 nm f=0.0025 <S\*\*2>=0.000

275 -> 278 0.67449

275 -> 279 0.20259

Excited State 11: Singlet-A 2.0020 eV 619.29 nm f=0.1008 <S\*\*2>=0.000

273 -> 278 0.69413

Excited State 12: Singlet-A 2.0913 eV 592.84 nm f=0.0003 <S\*\*2>=0.000

274 -> 278 0.69251

274 -> 279 0.13829

Excited State 13: Singlet-A 2.1669 eV 572.17 nm f=0.0406 <S\*\*2>=0.000

264 -> 277 -0.10602

266 -> 277 -0.19280

269 -> 277 0.57620

270 -> 277 -0.29836

Excited State 14: Singlet-A 2.2499 eV 551.07 nm f=0.0164 <S\*\*2>=0.000

262 -> 277 -0.14960

264 -> 277 0.16383

265 -> 277 -0.18467

266 -> 277 0.55816

269 -> 277 0.29039

Excited State 15: Singlet-A 2.2671 eV 546.89 nm f=0.0009 <S\*\*2>=0.000

273 -> 279 0.70250

Excited State 16: Singlet-A 2.3278 eV 532.61 nm f=0.0000 <S\*\*2>=0.000

276 -> 281 0.70644

Excited State 17: Singlet-A 2.3670 eV 523.80 nm f=0.0046 <S\*\*2>=0.000

266 -> 277 -0.12250

269 -> 277 0.14917

270 -> 277 0.34301

272 -> 277 0.58300

Excited State 18: Singlet-A 2.4146 eV 513.48 nm f=0.0058 <S\*\*2>=0.000

266 -> 277 -0.13463

269 -> 277 0.20885

270 -> 277 0.50654

271 -> 277 -0.15173

272 -> 277 -0.39076

Excited State 19: Singlet-A 2.4808 eV 499.77 nm f=0.0013 <S\*\*2>=0.000

270 -> 277 0.11744

271 -> 277 0.68079

Excited State 20: Singlet-A 2.4848 eV 498.97 nm f=0.0318 <S\*\*2>=0.000

262 -> 277 0.23559

263 -> 277 0.11813

264 -> 277 -0.25985

265 -> 277 0.48001

266 -> 277 0.30887

271 -> 277 0.10745

Excited State 21: Singlet-A 2.5051 eV 494.93 nm f=0.0066 <S\*\*2>=0.000

272 -> 278 -0.16253

272 -> 279 0.65551

275 -> 281 -0.14659

Excited State 22: Singlet-A 2.6027 eV 476.36 nm f=0.0549 <S\*\*2>=0.000

262 -> 277 -0.27955

263 -> 277 -0.15387

264 -> 277 0.37695

265 -> 277 0.44734

270 -> 278 0.15784



Excited State 23: Singlet-A 2.6164 eV 473.87 nm f=0.2155 <S\*\*2>=0.000

265 -> 277 -0.13519

269 -> 278 0.15578

270 -> 278 0.56311

270 -> 279 -0.17228

272 -> 278 0.23913

275 -> 281 -0.10674

Excited State 24: Singlet-A 2.6294 eV 471.54 nm f=0.0000 <S\*\*2>=0.000

268 -> 277 0.70073

Excited State 25: Singlet-A 2.6660 eV 465.06 nm f=0.0387 <S\*\*2>=0.000

263 -> 279 0.12039

268 -> 279 0.20050

270 -> 278 0.11461

271 -> 279 -0.28774

274 -> 281 0.31519

275 -> 281 0.46213

## **TD-DFT of TPA4 in DCM solvent.**

Calculation method: B3LYP/6-31G(d,p)

Excitation energies and oscillator strengths:

Excited State 1: Singlet-A 0.9994 eV 1240.55 nm f=0.0019 <S\*\*2>=0.000

262 -> 265 0.55177

263 -> 265 -0.41174

264 -> 265 0.17715

262 <- 265 -0.13210

This state for optimization and/or second-order correction.

Total Energy, E(TD-HF/TD-KS) = -3510.85180030

Copying the excited state density for this state as the 1-particle RhoCI density.

Excited State 2: Singlet-A 1.0242 eV 1210.59 nm f=0.0107 <S\*\*2>=0.000

260 -> 265 0.10587

262 -> 265 0.46521

263 -> 265 0.46569

264 -> 265 -0.24567

262 <- 265 -0.10367

Excited State 3: Singlet-A 1.4279 eV 868.32 nm f=0.0010 <S\*\*2>=0.000

263 -> 265 0.30272

264 -> 265 0.63347

Excited State 4: Singlet-A 1.4949 eV 829.39 nm f=0.0038 <S\*\*2>=0.000

260 -> 267 0.21247

262 -> 267 0.18364

263 -> 267 0.57139

264 -> 267 -0.27966

Excited State 5: Singlet-A 1.6141 eV 768.15 nm f=0.0030 <S\*\*2>=0.000

262 -> 266 0.69046

263 -> 266 -0.10522

Excited State 6: Singlet-A 1.6977 eV 730.31 nm f=0.0371 <S\*\*2>=0.000

263 -> 266 0.25204

264 -> 266 0.64906

Excited State 7: Singlet-A 1.7263 eV 718.22 nm f=0.0015 <S\*\*2>=0.000

262 -> 267 0.67682

263 -> 267 -0.16686

Excited State 8: Singlet-A 1.7498 eV 708.55 nm f=0.4461 <S\*\*2>=0.000

260 -> 265 -0.29067

263 -> 266 0.57142

263 -> 268 0.12656

264 -> 266 -0.22305

Excited State 9: Singlet-A 1.8406 eV 673.59 nm f=0.1817 <S\*\*2>=0.000

260 -> 265 0.57931

261 -> 265 0.19496

263 -> 265 -0.12791

263 -> 266 0.23730

263 -> 268 0.11824

264 -> 266 -0.10789

Excited State 10: Singlet-A 1.9325 eV 641.57 nm f=0.0038 <S\*\*2>=0.000

260 -> 265 -0.18822

261 -> 265 0.66329

Excited State 11: Singlet-A 2.1578 eV 574.58 nm f=0.0068 <S\*\*2>=0.000

263 -> 267 0.29799

264 -> 267 0.63523

Excited State 12: Singlet-A 2.1744 eV 570.20 nm f=0.2652 <S\*\*2>=0.000

260 -> 266 -0.15113

261 -> 266 0.44324

263 -> 266 -0.13443

263 -> 268 0.44094

264 -> 268 -0.19940

Excited State 13: Singlet-A 2.1942 eV 565.04 nm f=0.1594 <S\*\*2>=0.000

260 -> 266 0.13735

261 -> 266 0.52019

263 -> 268 -0.40066

264 -> 268 0.15975

Excited State 14: Singlet-A 2.3042 eV 538.07 nm f=0.0019 <S\*\*2>=0.000

258 -> 265 0.13543

259 -> 265 0.67763

Excited State 15: Singlet-A 2.3263 eV 532.97 nm f=0.0182 <S\*\*2>=0.000

262 -> 268 0.68047

264 -> 268 -0.16947

Excited State 16: Singlet-A 2.3694 eV 523.28 nm f=0.2184 <S\*\*2>=0.000

260 -> 266 -0.14174

261 -> 268 0.10767

262 -> 268 0.16606

263 -> 268 0.22722

264 -> 268 0.61514

Excited State 17: Singlet-A 2.3938 eV 517.94 nm f=0.0187 <S\*\*2>=0.000

255 -> 265 0.64177

255 -> 267 -0.13997

260 -> 267 -0.14434

Excited State 18: Singlet-A 2.5062 eV 494.72 nm f=0.1038 <S\*\*2>=0.000

255 -> 265 0.18179

255 -> 267 0.11417

260 -> 266 -0.26703

260 -> 267 0.54801

261 -> 267 0.11077

263 -> 267 -0.18066

Excited State 19: Singlet-A 2.5170 eV 492.59 nm f=0.4016 <S\*\*2>=0.000

253 -> 265 -0.13058  
260 -> 266 0.53842  
260 -> 267 0.25772  
260 -> 268 0.12892  
263 -> 266 -0.11943  
263 -> 268 0.21238

Excited State 20: Singlet-A 2.5543 eV 485.40 nm f=0.0035 <S\*\*2>=0.000

258 -> 265 0.66023  
259 -> 265 -0.14423

Excited State 21: Singlet-A 2.5782 eV 480.90 nm f=0.0298 <S\*\*2>=0.000

258 -> 265 0.10569  
258 -> 266 0.17356  
259 -> 266 0.65559  
261 -> 266 -0.12409

Excited State 22: Singlet-A 2.6743 eV 463.61 nm f=0.0050 <S\*\*2>=0.000

261 -> 267 0.68684

Excited State 23: Singlet-A 2.7113 eV 457.28 nm f=0.0707 <S\*\*2>=0.000

261 -> 269 -0.14303  
263 -> 269 0.28016  
264 -> 269 0.58350  
264 -> 270 -0.15490

Excited State 24: Singlet-A 2.7198 eV 455.86 nm f=0.0077 <S\*\*2>=0.000

249 -> 265 -0.20911

253 -> 265 0.58566

255 -> 267 -0.18105

260 -> 267 0.13499

Excited State 25: Singlet-A 2.8003 eV 442.75 nm f=0.0029 <S\*\*2>=0.000

249 -> 265 -0.10962

251 -> 265 -0.13061

257 -> 266 -0.10551

258 -> 266 0.56911

259 -> 266 -0.19693

260 -> 268 -0.21527

261 -> 268 -0.13223

## TD-DFT of TPA5 in DCM solvent.

Calculation method: CAM-B3LYP/6-31G(d,p)

Excitation energies and oscillator strengths:

Excited State 1: Singlet-A 0.3584 eV 3459.25 nm f=0.0304 <S\*\*2>=0.000

313 -> 317 0.13362

316 -> 317 -1.14036

316 -> 319 -0.11581

313 <- 317 -0.14734

316 <- 317 0.89839

316 <- 319 0.10612

This state for optimization and/or second-order correction.

Total Energy, E(TD-HF/TD-KS) = -4187.61902154

Copying the excited state density for this state as the 1-particle RhoCI density.

Excited State 2: Singlet-A 1.1195 eV 1107.54 nm f=0.0680 <S\*\*2>=0.000

308 -> 318 0.17986

309 -> 318 0.43948

309 -> 320 0.14557

312 -> 318 0.26198

315 -> 318 0.42902

315 <- 318 -0.17247

Excited State 3: Singlet-A 1.4495 eV 855.38 nm f=0.0007 <S\*\*2>=0.000

305 -> 317 0.19957

307 -> 317 0.65528

Excited State 4: Singlet-A 1.5132 eV 819.33 nm f=0.1384 <S\*\*2>=0.000

308 -> 318 0.16031

309 -> 318 0.21185

312 -> 318 -0.25677

314 -> 318 0.50451

315 -> 318 -0.25009



Excited State 5: Singlet-A 1.5254 eV 812.82 nm f=0.1627 <S\*\*2>=0.000

301 -> 317 0.10444

310 -> 317 -0.28162

313 -> 317 0.58611

316 -> 319 0.18282

Excited State 6: Singlet-A 1.6504 eV 751.25 nm f=0.3896 <S\*\*2>=0.000

308 -> 318 -0.13887

309 -> 318 -0.22767

312 -> 318 -0.24661

314 -> 318 0.25761

314 -> 320 0.12009

315 -> 318 0.54615

315 <- 318 -0.18516

Excited State 7: Singlet-A 1.6926 eV 732.49 nm f=0.2244 <S\*\*2>=0.000

300 -> 317 -0.13059

301 -> 317 0.27816

302 -> 317 -0.14726

305 -> 317 0.39715

310 -> 317 0.29885

316 -> 319 0.28496

Excited State 8: Singlet-A 1.7060 eV 726.77 nm f=0.0000 <S\*\*2>=0.000

315 -> 317 0.70672

Excited State 9: Singlet-A 1.7383 eV 713.25 nm f=0.0082 <S\*\*2>=0.000

304 -> 317 0.69664

Excited State 10: Singlet-A 1.7770 eV 697.71 nm f=0.0060 <S\*\*2>=0.000

303 -> 318 -0.14059

306 -> 318 -0.31513

308 -> 318 0.50066

308 -> 320 0.13850

309 -> 318 -0.27315

Excited State 11: Singlet-A 1.9023 eV 651.74 nm f=0.6286 <S\*\*2>=0.000

301 -> 317 -0.20241

302 -> 317 0.10074

305 -> 317 -0.20819

313 -> 317 -0.14197

316 -> 319 0.58748

Excited State 12: Singlet-A 1.9145 eV 647.60 nm f=0.0053 <S\*\*2>=0.000

316 -> 318 0.70352

Excited State 13: Singlet-A 2.0367 eV 608.75 nm f=0.3021 <S\*\*2>=0.000

305 -> 317 -0.25668

307 -> 317 0.15042

310 -> 317 0.53673

313 -> 317 0.29395

316 -> 319 -0.10675

Excited State 14: Singlet-A 2.0519 eV 604.25 nm f=0.0162 <S\*\*2>=0.000

306 -> 318 0.59590

306 -> 320 0.15078

308 -> 318 0.25593

309 -> 318 -0.16609

Excited State 15: Singlet-A 2.2700 eV 546.18 nm f=0.7908 <S\*\*2>=0.000

314 -> 318 0.10123

314 -> 320 -0.12547

315 -> 319 -0.10032

315 -> 320 0.67043

Excited State 16: Singlet-A 2.4240 eV 511.48 nm f=0.3125 <S\*\*2>=0.000

303 -> 318 0.19167

303 -> 320 0.10753

308 -> 318 -0.13627

309 -> 318 -0.19125

312 -> 318 0.47588

314 -> 318 0.35872

315 -> 320 -0.11572

Excited State 17: Singlet-A 2.4250 eV 511.28 nm f=0.0014 <S\*\*2>=0.000

314 -> 317 0.70402

Excited State 18: Singlet-A 2.5941 eV 477.94 nm f=0.0070 <S\*\*2>=0.000

299 -> 317 0.31201

301 -> 317 -0.21320

302 -> 317 0.20146

305 -> 317 0.19167

311 -> 317 0.41921

312 -> 317 0.18470

313 -> 317 0.14736

313 -> 319 -0.12349

Excited State 19: Singlet-A 2.6429 eV 469.12 nm f=0.0407 <S\*\*2>=0.000

299 -> 317 0.55754

300 -> 317 -0.15137

301 -> 317 0.18591

305 -> 317 -0.25035

311 -> 317 -0.12308

313 -> 317 -0.10631

Excited State 20: Singlet-A 2.7379 eV 452.84 nm f=0.0169 <S\*\*2>=0.000

299 -> 317 -0.14077

300 -> 317 -0.14644

301 -> 317 0.27781

305 -> 317 -0.24083

311 -> 317 0.39070

312 -> 317 0.31652

313 -> 319 0.14359

Excited State 21: Singlet-A 2.8236 eV 439.09 nm f=0.0141 <S\*\*2>=0.000

316 -> 320 0.67788

316 -> 322 0.16531

Excited State 22: Singlet-A 2.8420 eV 436.26 nm f=0.0040 <S\*\*2>=0.000

311 -> 317 -0.35445

312 -> 317 0.59458

Excited State 23: Singlet-A 2.8576 eV 433.87 nm f=0.2222 <S\*\*2>=0.000

301 -> 317 -0.10145

313 -> 319 0.53557

314 -> 320 0.15298

316 -> 322 -0.31557

Excited State 24: Singlet-A 2.8662 eV 432.57 nm f=0.2755 <S\*\*2>=0.000

313 -> 319 0.27080

314 -> 320 0.18042

316 -> 320 -0.16192

316 -> 322 0.56723

Excited State 25: Singlet-A 2.8740 eV 431.39 nm f=0.0304 <S\*\*2>=0.000

|            |          |
|------------|----------|
| 313 -> 319 | -0.24375 |
| 314 -> 320 | 0.53163  |
| 315 -> 321 | -0.17806 |
| 316 -> 322 | -0.10333 |
